# Supplementary material for: Formononetin Administration Ameliorates Dextran Sulfate Sodium-Induced Acute Colitis by Inhibiting NLRP3 Inflammasome Signaling Pathway
Source: Hindawi journal article supplement (doi:10.1155/2018/3048532), 2018-01-01
Supplement: f1 [file 3048532.f1.pdf]

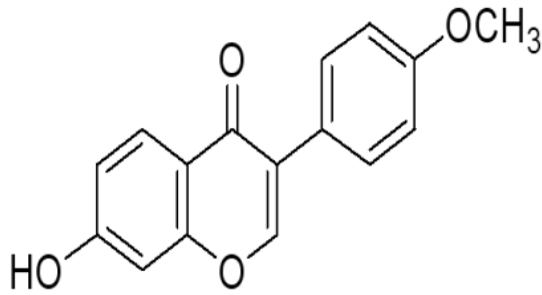

**Supplementary Figure S1.** Chemical structure of formononetin.

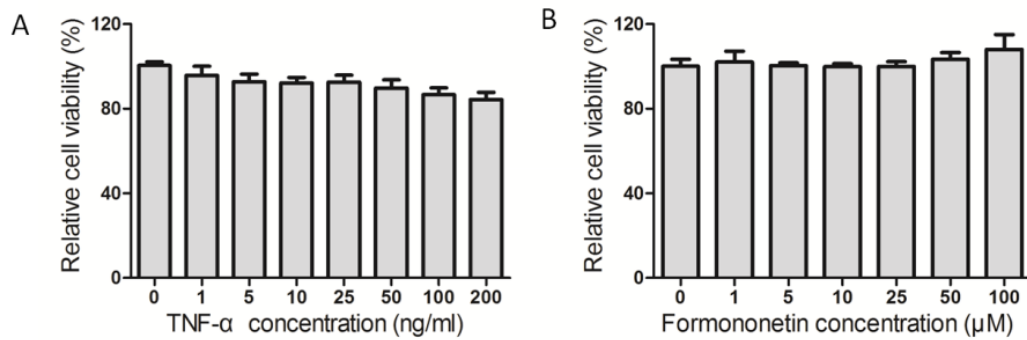

**Supplementary Figure S2.** Cell viability was measured by MTS assay in different concentration of TNF- $\alpha$  (A) and Formononetin (B) on HCT-166 cells. Data are shown as relative cell viability (mean %  $\pm$  S.E. bar) as compared with that in control (n = 5).

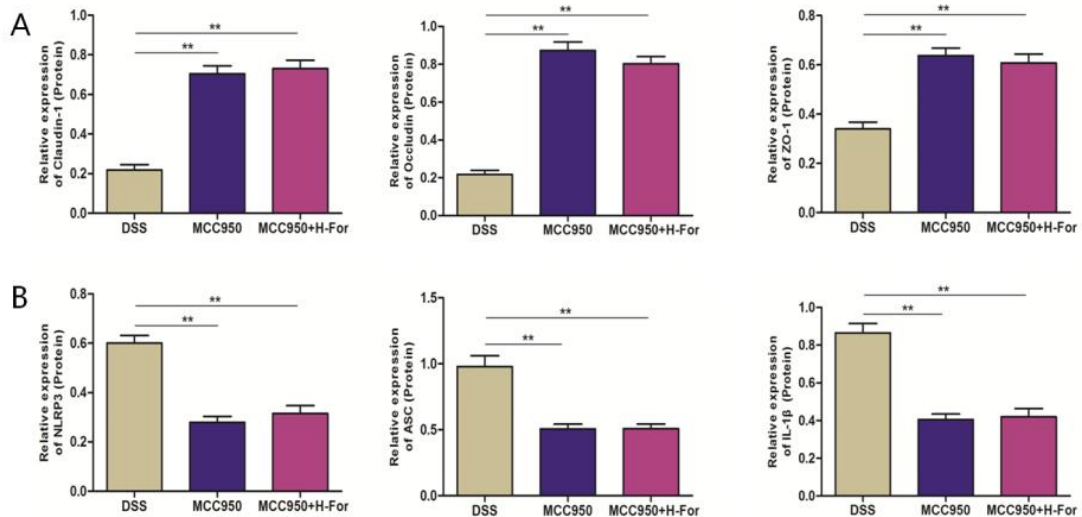

**Supplementary Figure S3.** NLRP3 inhibitor MCC950 eliminated the protective effect of H-For on acute colitis in mice. Protein levels of (A) Claudin-1, Occludin and ZO-1 and (B) NLRP3, ASC, and IL-1 $\beta$  were analyzed by western blotting. \*p<0.05, \*\*p<0.01.
